# Supplementary material for: Effect of postnatal low-dose exposure to environmental chemicals on the gut microbiome in a rodent model
Source: PubMed Central journal article supplement (PMC4906585; doi:10.1186/s40168-016-0173-2), 2016-06-14

## Supplementary Tables

**Table S1. The significance of the overall microbiota differences between treatment groups by PerMANOVA (Permutational Multivariate Analysis of Variance) procedure.** Test was performed with the maximum number of permutations = 999 and used the [Adonis] function of the R package *vegan* 2.0-5 partitions the Bray Curtis distance matrix among sources of variation, fits linear models to distance matrices and uses a permutation test with pseudo-F ratios to obtain the p-values.

### PND62

| Treatment | MPB  | TCS   | MIX  | OIL          |
|-----------|------|-------|------|--------------|
| DEP       | 0.29 | 0.067 | 0.20 | <b>0.019</b> |
| MPB       |      | 0.23  | 0.2  | <b>0.006</b> |
| TCS       |      |       | 0.18 | <b>0.005</b> |
| MIX       |      |       |      | <b>0.039</b> |

### PND181

| Treatment | MPB  | TCS  | MIX   | OIL  |
|-----------|------|------|-------|------|
| DEP       | 0.17 | 0.39 | 0.064 | 0.57 |
| MPB       |      | 0.41 | 0.23  | 0.5  |
| TCS       |      |      |       | 0.71 |
| MIX       |      |      |       | 0.5  |

**Table S2. List of differential OTUs by treatment at 62 days and 181days.** Fold changes were calculated using the mean taxa abundance of the treatment group divided by the control group. We performed the log likelihood ratio test (QIIME command `group_significance.py` using `g_test` statistics) to further identify significant differential OTUs between each treatment and the normal controls. The resulted *p*-values were adjusted by the FDR methods.

At 62 Days

| Treatments | OTUs with FDR adjusted p-value <0.05 |                                          |            |         |             |
|------------|--------------------------------------|------------------------------------------|------------|---------|-------------|
|            | OTU ID                               | Taxonomy (family/genus)                  | Abundance% |         | Fold change |
|            |                                      |                                          | Treated    | Control |             |
| DEP        | 171232                               | Lactobacillaceae/Lactobacillus           | 1.5        | 9.0     | 0.16        |
|            | 1107027                              | Lactobacillaceae/Lactobacillus           | 6.9        | 1.3     | 5.5         |
|            | 4397402                              | Lactobacillaceae/Lactobacillus           | 3.3        | 9.4     | 0.35        |
|            | 137580                               | Lactobacillaceae/Lactobacillus           | 0.24       | 2.6     | 0.09        |
|            | 47365                                | Lactobacillaceae/Lactobacillus           | 0.07       | 1.3     | 0.05        |
|            | 2614328                              | Fusobacteriaceae/Fusobacterium           | 0.9        | 0.02    | 45.7        |
|            | 291045                               | Ruminococcaceae/non-identified           | 0.26       | 1.3     | 0.2         |
|            | 3878210                              | Peptostreptococcaceae/Peptostreptococcus | 0.59       | 0.01    | 59.3        |
|            | 4452538                              | Fusobacteriaceae/Fusobacterium           | 0.6        | 0.02    | 40          |
| MPB        | 171232                               | Lactobacillaceae/Lactobacillus           | 1.1        | 9.0     | 0.12        |
|            | 4397402                              | Lactobacillaceae/Lactobacillus           | 2.5        | 9.5     | 0.26        |
|            | 579750                               | Non-identified                           | 0.02       | 1.4     | 0.01        |
|            | 137043                               | Lactobacillaceae/Lactobacillus           | 0.49       | 2.4     | 0.21        |
|            | 47365                                | Lactobacillaceae/Lactobacillus           | 0.15       | 1.4     | 0.10        |
|            | 4455767                              | Streptococcaceae/Streptococcus           | 0.89       | 0.03    | 29.5        |
|            | 4297695                              | Campylobacteraceae/Campylobacter         | 0.82       | 0.03    | 32.6        |
|            | 182016                               | Non-identified                           | 0.31       | 1.4     | 0.22        |
|            | 392918                               | Ruminococcaceae/non-identified           | 1.1        | 0.20    | 5.7         |
|            | 524661                               | Bacteroidaceae/Bacteroides               | 1.0        | 0.17    | 6.2         |
|            | 137580                               | Lactobacillaceae/Lactobacillus           | 0.98       | 2.5     | 0.4         |
| TCS        | 579750                               | Non-identified                           | 0.05       | 1.4     | 0.03        |
|            | 176298                               | Non-identified                           | 2.0        | 0.4     | 4.8         |
|            | 291055                               | Prevotellaceae/Prevotella                | 1.4        | 0.2     | 7.1         |
|            | 4397402                              | Lactobacillaceae/Lactobacillus           | 5.5        | 9.2     | 0.6         |
| MIX        | 291045                               | Ruminococcaceae/non-identified           | 0.06       | 1.3     | 0.047       |
|            | 579750                               | Non-identified                           | 0.17       | 1.5     | 0.11        |
|            | 29029                                | Ruminococcaceae/Ruminococcus             | 0.46       | 1.9     | 0.24        |
|            | 279298                               | Non-identified                           | 1.8        | 0.4     | 4.3         |
|            | 326231                               | Ruminococcaceae/Ruminococcus             | 0.2        | 1.2     | 0.17        |

At 181 Days

|     |        |                                |      |      |      |
|-----|--------|--------------------------------|------|------|------|
| MIX | 316277 | Non-identified                 | 1.03 | 0.03 | 37   |
|     | 176298 | Non-identified                 | 0.04 | 0.91 | 0.04 |
|     | 261325 | Ruminococcaceae/non-identified | 0.98 | 0.08 | 12.6 |

**Table S3. The sequences of dual-barcoding 16S PCR primers.** The primer sequences include 2 bp linker (*italicized*) and 6 bp barcodes (**bold**) at the 5' end.

| Primer ID | Sequence (5' to 3')                 |
|-----------|-------------------------------------|
| 803R_b1   | <i>AGTCGACACT</i> ACCRGGGTATCTAATCC |
| 803R_b2   | <i>AGGAACTCCT</i> ACCRGGGTATCTAATCC |
| 803R_b3   | <i>AGCTGTAGCT</i> ACCRGGGTATCTAATCC |
| 803R_b4   | <i>AGGACACGCT</i> ACCRGGGTATCTAATCC |
| 803R_b5   | <i>AGAGCGAGCT</i> ACCRGGGTATCTAATCC |
| 803R_b6   | <i>AGTCTCTACT</i> ACCRGGGTATCTAATCC |
| 803R_b7   | <i>AGCGTGTCT</i> ACCRGGGTATCTAATCC  |
| 803R_b8   | <i>AGATGCGTCT</i> ACCRGGGTATCTAATCC |
| 803R_b9   | <i>AGAACGCACT</i> ACCRGGGTATCTAATCC |
| 803R_b10  | <i>AGATTACCCT</i> ACCRGGGTATCTAATCC |
| 803R_b11  | <i>AGTGGTCACT</i> ACCRGGGTATCTAATCC |
| 803R_b12  | <i>AGCCGTTTCT</i> ACCRGGGTATCTAATCC |
| 347F_b1   | <i>AGTCGACAGG</i> AGGCAGCAGTRRGAAT  |
| 347F_b2   | <i>AGGAACTCGG</i> AGGCAGCAGTRRGAAT  |
| 347F_b3   | <i>AGCTGTAGGG</i> AGGCAGCAGTRRGAAT  |
| 347F_b4   | <i>AGGACACGGG</i> AGGCAGCAGTRRGAAT  |
| 347F_b5   | <i>AGAGCGAGGG</i> AGGCAGCAGTRRGAAT  |
| 347F_b6   | <i>AGTCTCTAGG</i> AGGCAGCAGTRRGAAT  |
| 347F_b7   | <i>AGCGTGTCTG</i> AGGCAGCAGTRRGAAT  |
| 347F_b8   | <i>AGATGCGTGG</i> AGGCAGCAGTRRGAAT  |
| 347F_b9   | <i>AGAACGCAGG</i> AGGCAGCAGTRRGAAT  |
| 347F_b10  | <i>AGATTACCGG</i> AGGCAGCAGTRRGAAT  |
| 347F_b11  | <i>AGTGGTCAGG</i> AGGCAGCAGTRRGAAT  |
| 347F_b12  | <i>AGCCGTTTGG</i> AGGCAGCAGTRRGAAT  |

## Supplementary Figures

### **S1. Multiplex double-barcoding 16S rRNA sequencing. 1A. Illustration of Multiplex double-barcoding 16S rRNA sequencing.**

Bacterial 16S DNAs were PCR amplified by universal primers. 8-bp barcodes were added at both forward and reverse primers. After PCR, 16S amplicons were pooled and sequenced. Based on the unique combination of the barcodes at both ends, the sequencing reads can be assigned to individual samples. **1B. Sequencing reproducibility.** The reproducibility of the 16S rRNA sequencing was validated using quadruplicate measurements. The bar plots present the taxa assignment and abundance of the quadruplicate measurements from phylum to genus level. At the same taxa level, different color stands for different taxa. The mean correlation among the quadruplicates was within the range of 0.991 to 0.994, while the mean correlation cross all samples is only 0.79 at phylum and 0.63 at genus.

**S2. Profiles of the rat microbiota at family level.** The bar plots present the taxa assignment and abundance of each individual samples grouped by age (PND 62 or PND 181) and treatments (OIL: oil control; DEP: Diethylphtalate; MPB: Methylparaben; TCS: Triclosan; and MIX: mixture of equal quantities of the three EDs).

### **S3. Microbiota diversity in environmental chemical treatment and control groups. S3A.**

The box plots present the mean and variance of the overall dissimilarity within groups by age or treatments. **S3B.** The box plots present the mean and variance of the alpha-diversity within groups by age or treatment.

**S4. Comparison of overall microbiota from rats exposed to varied environmental chemical at PND62 and PND181 using nMDS ordination.** The Bray-Curtis distance matrices generated from taxa composition and relative abundance at genus level were visualized in nMDS plot. The ellipses were drawn to represent the standard error. The texts of the group names were positioned at the center of each group.

**S5. The differential OTUs by treatment at PND 62.** Those OTUs were assigned to each genus and the logarithmized fold changes (treated/control) were shown in y-axis. The IDs of those OTUs Colors indicate the type of phylum. The size of the circle indicates the abundance of the OTU in control samples.

Figure S1

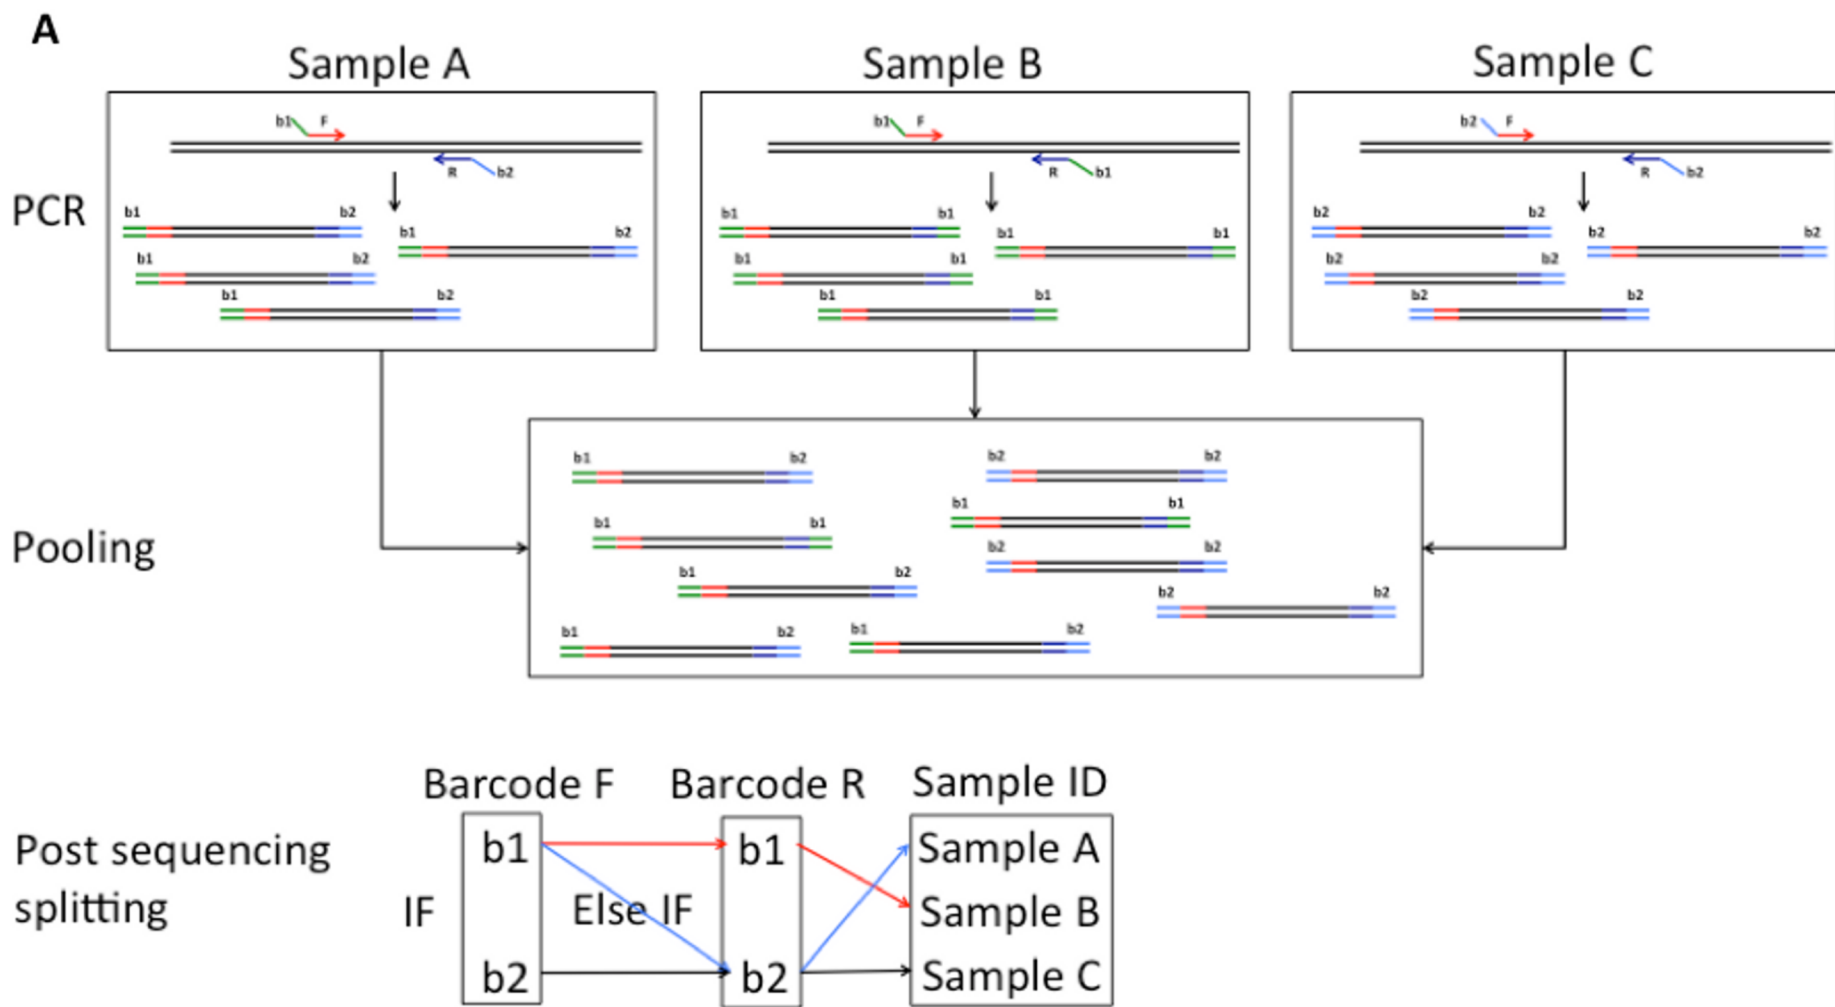**B**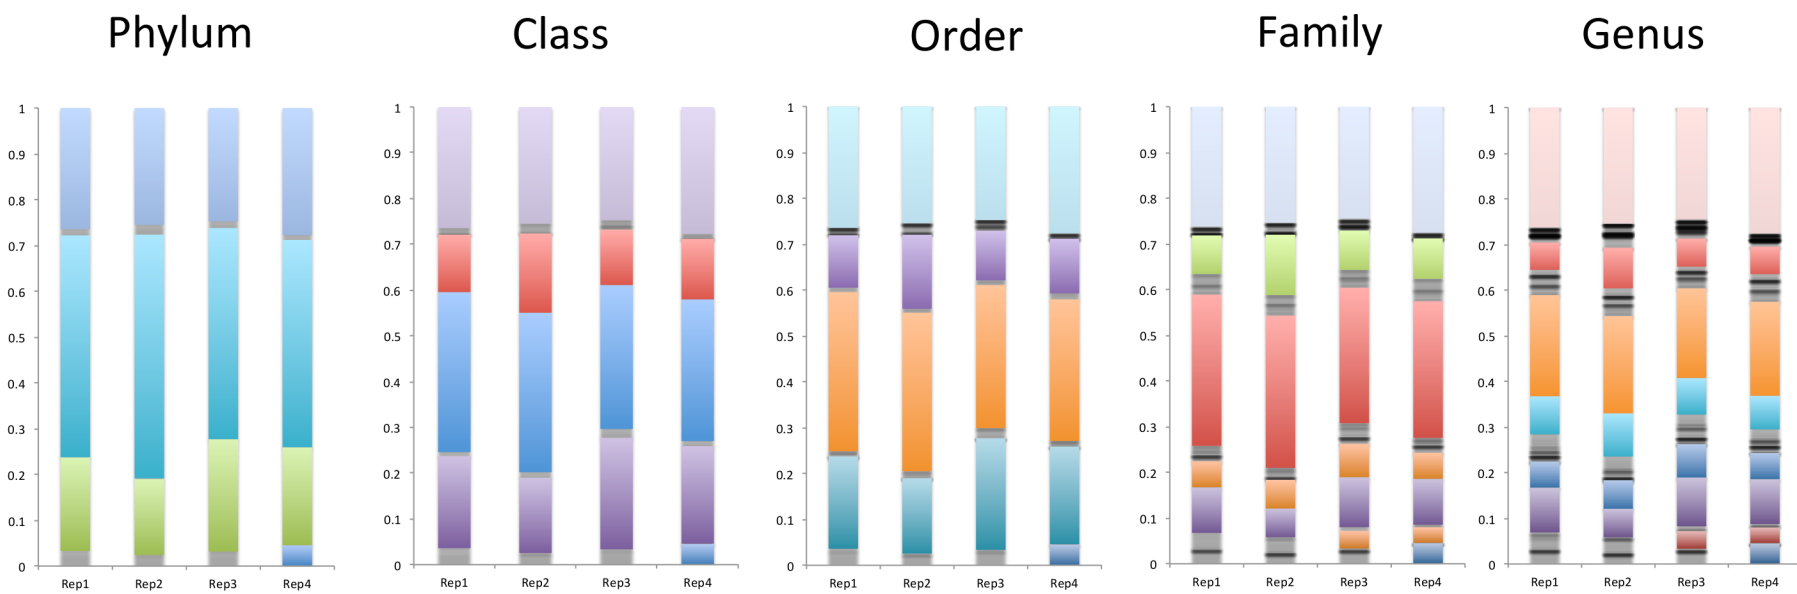

Figure S2

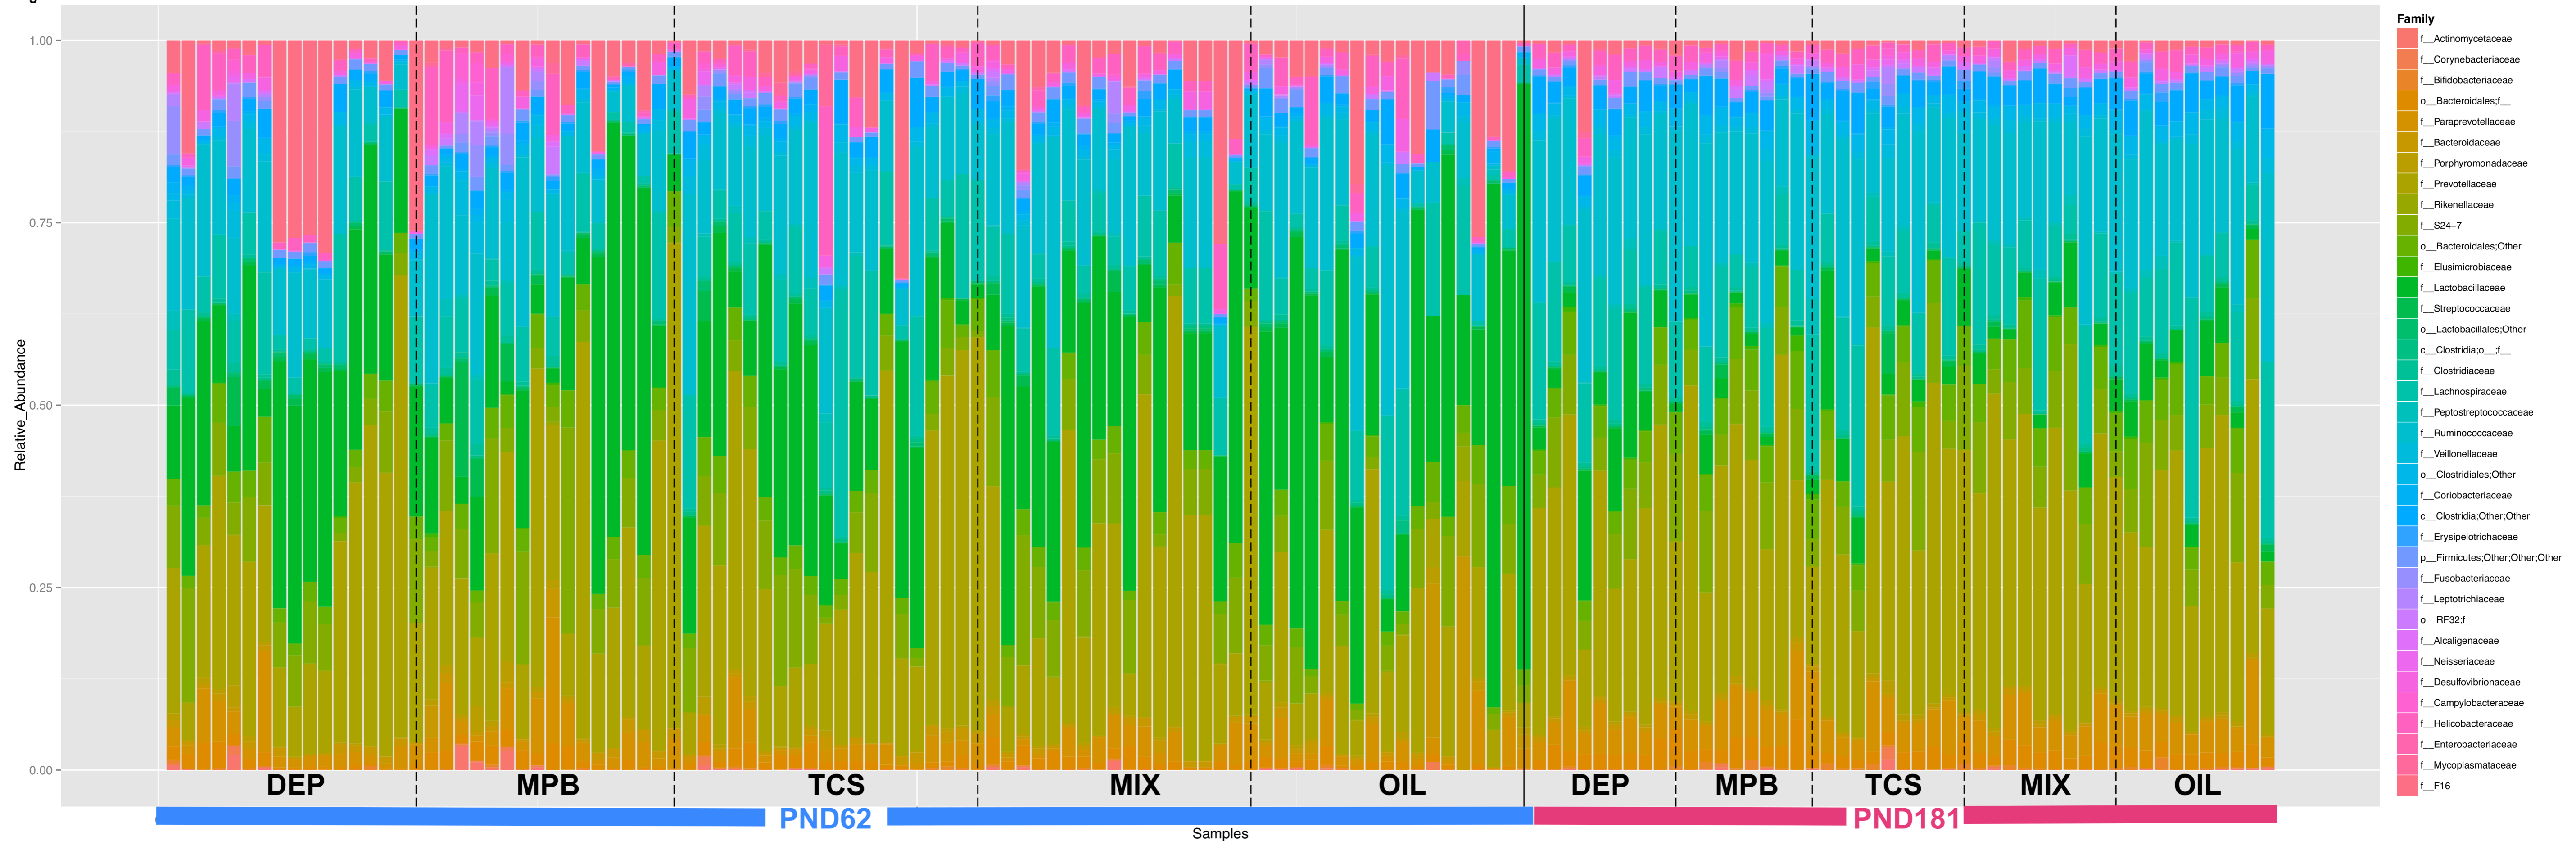

Figure S3

**A**

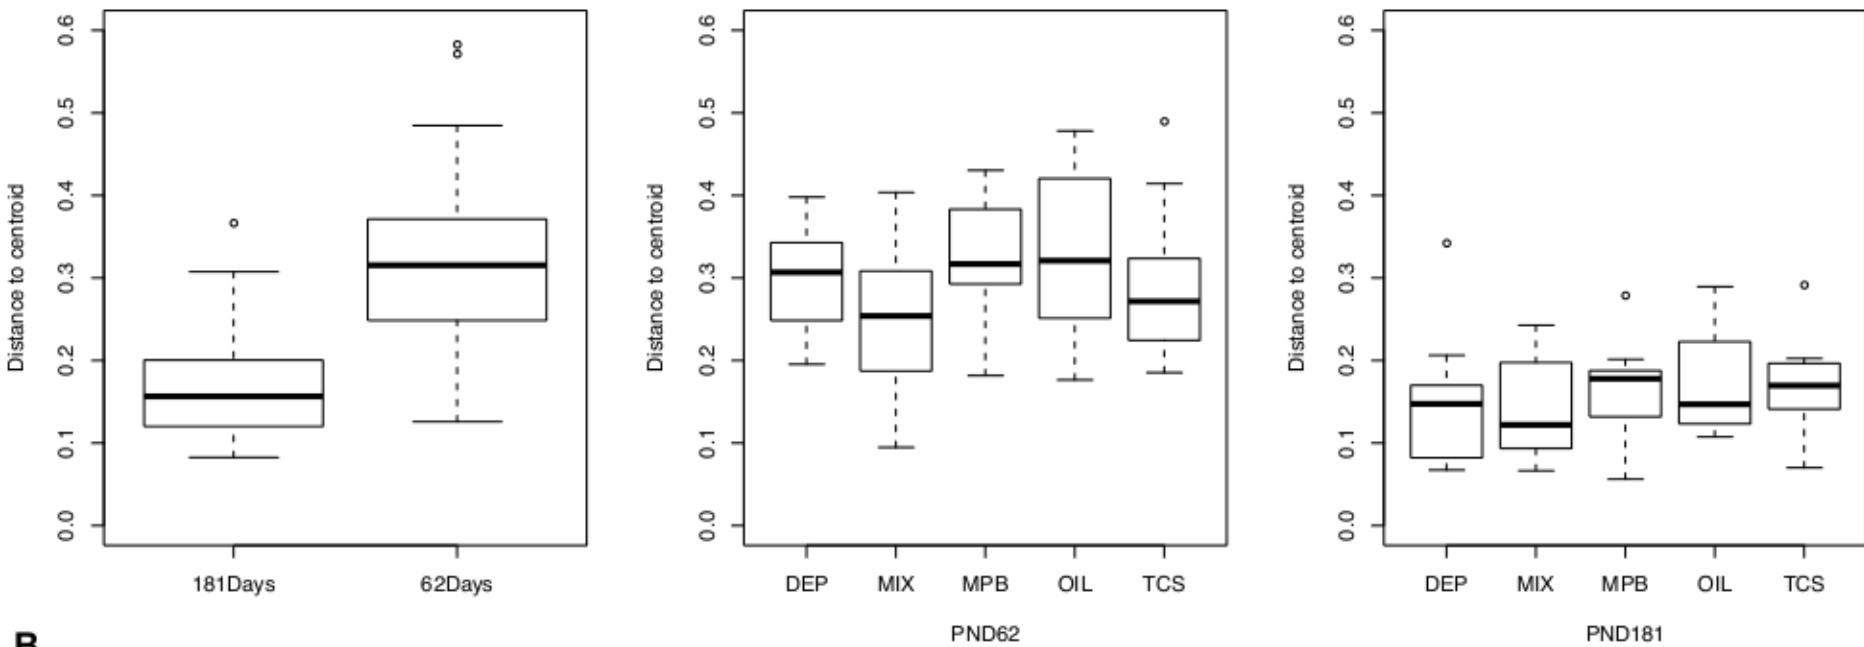

**B**

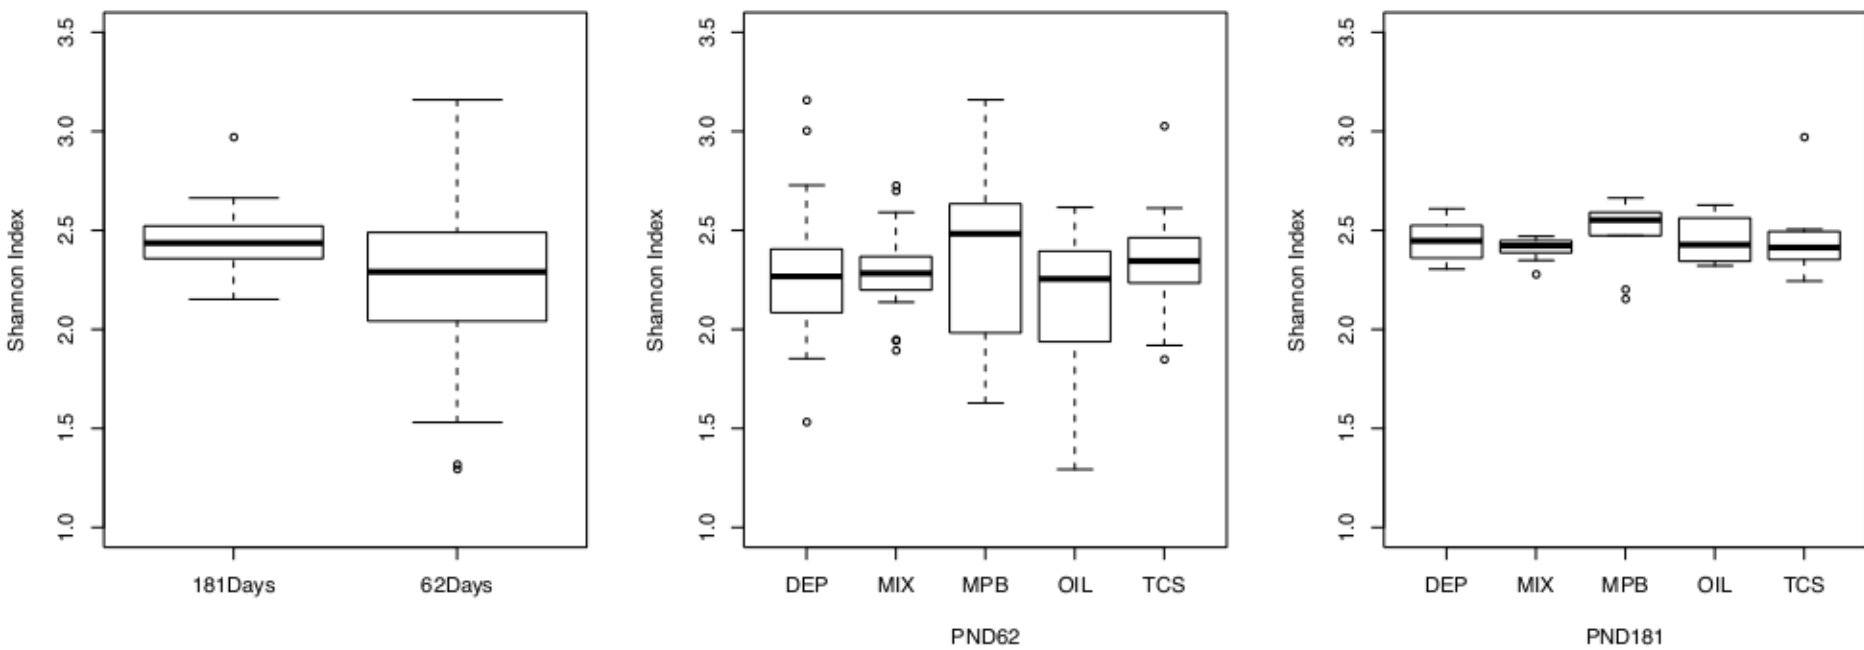

Figure S4

PND62

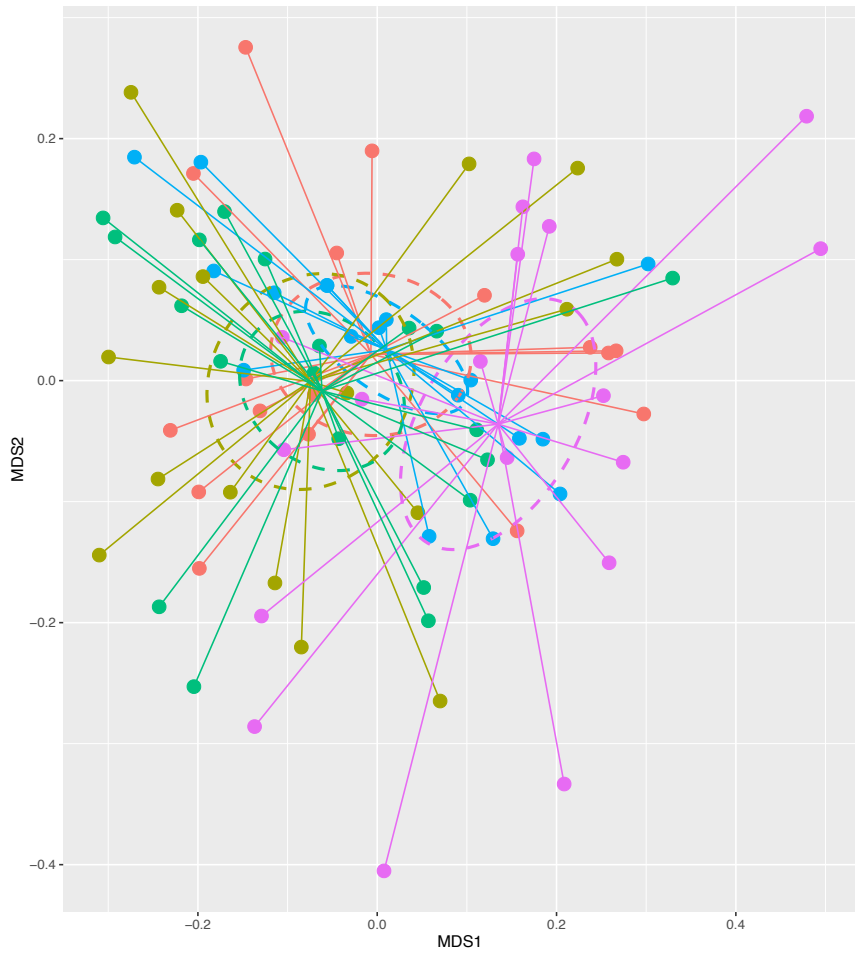

PND181

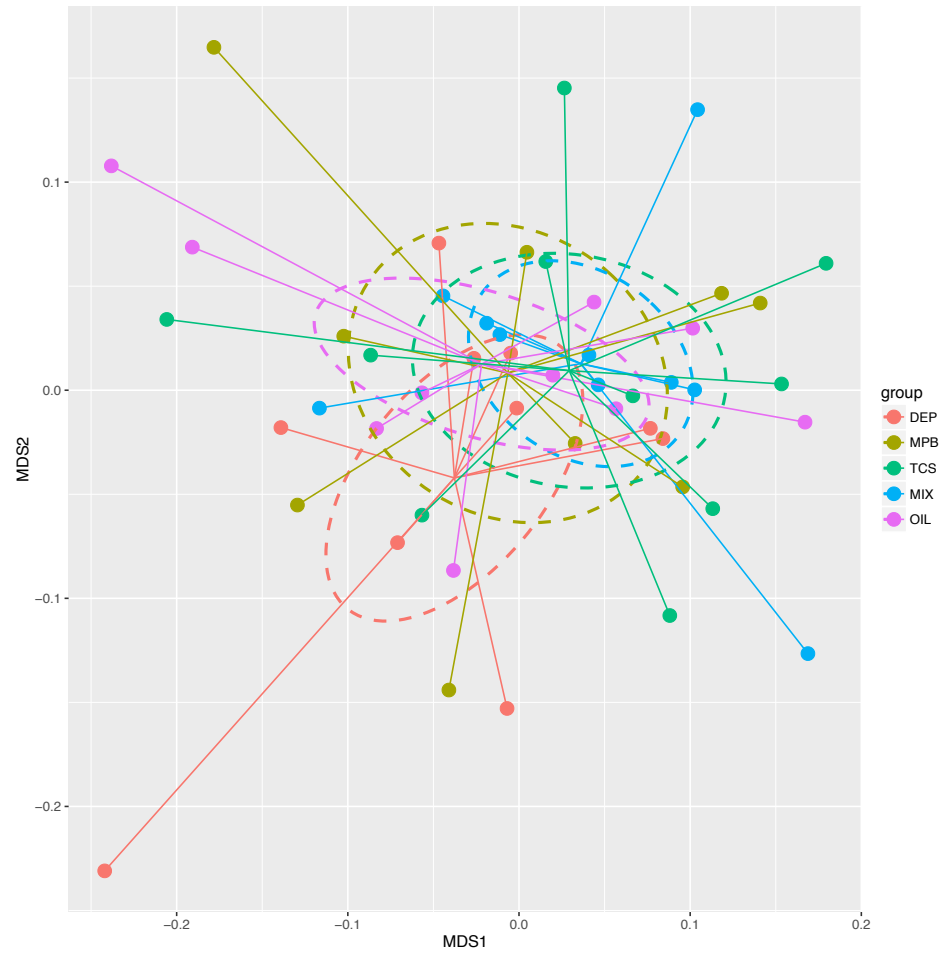



**Figure S5**

62Day DEP exposure vs. Oil control

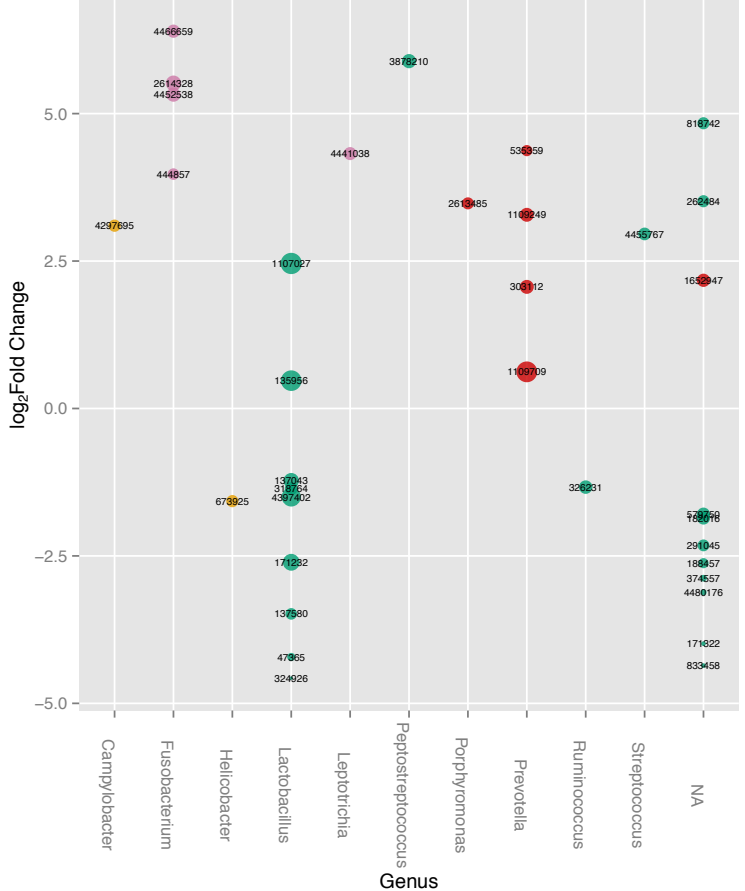

62Day MPB exposure vs. Oil control

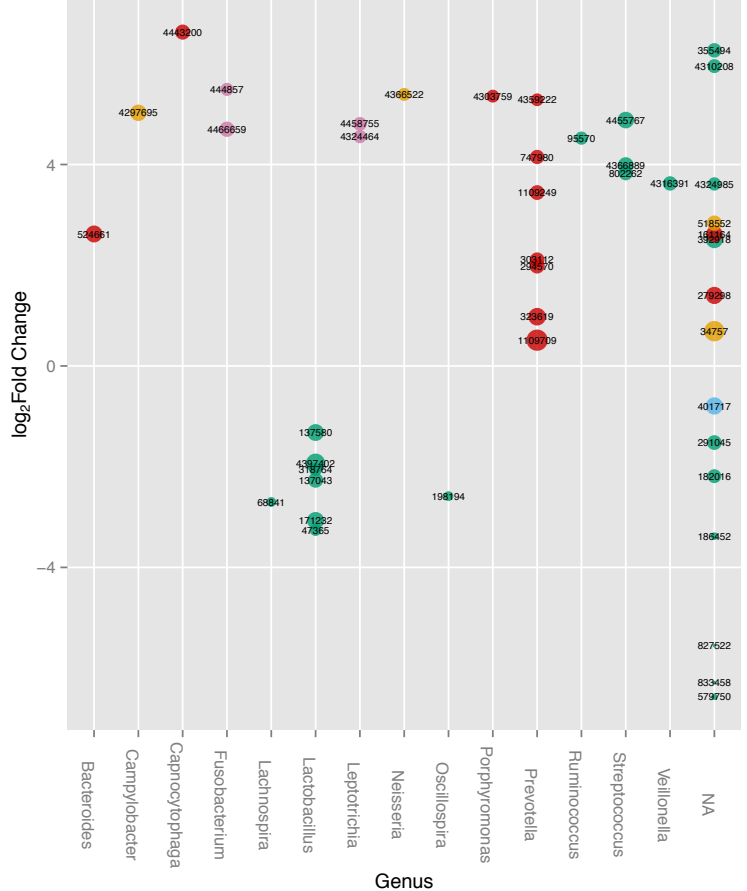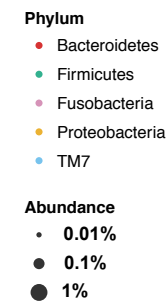

62Day TCS exposure vs. Oil control

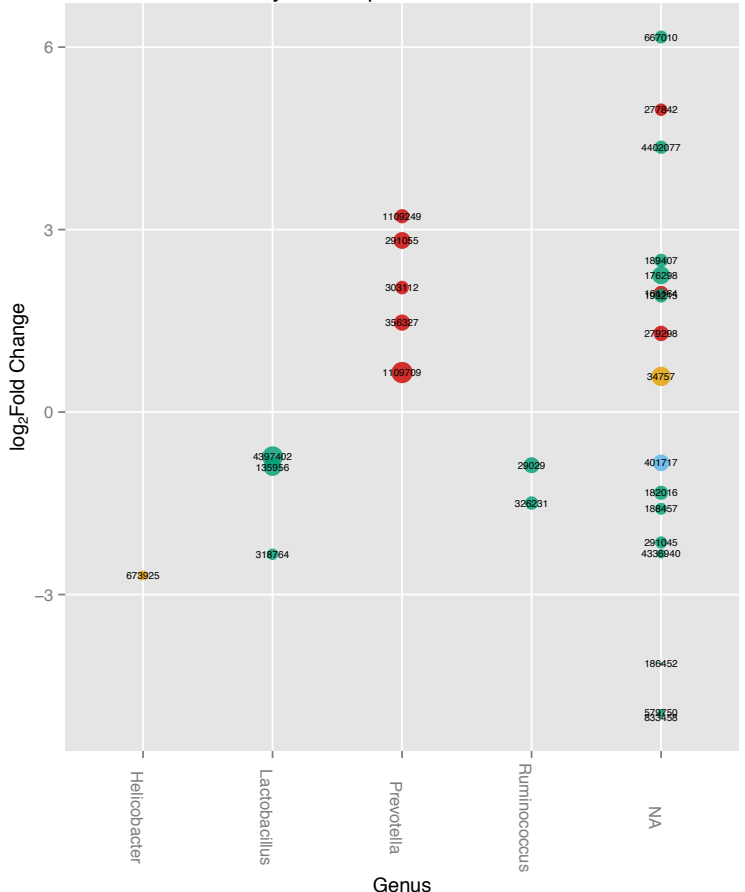

62Day MIX exposure vs. Oil control

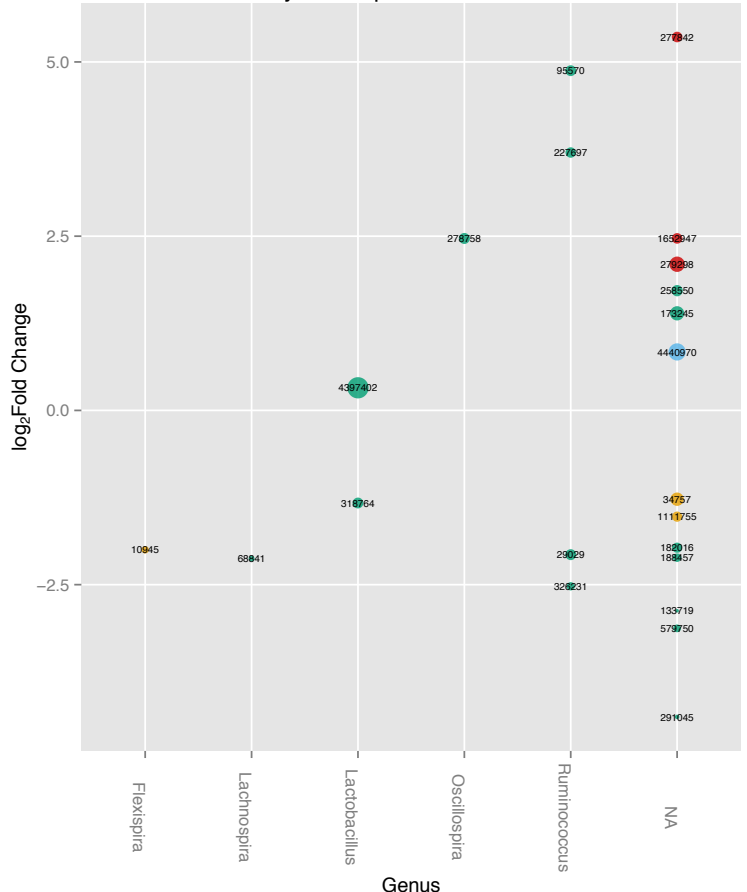

Supplement: 40168_2016_173_MOESM1_ESM.pdf [file 40168_2016_173_MOESM1_ESM.pdf]
